# Supplementary figures and images for: The hypoglycemic effect of mulberry (Morus atropurpurea) fruit lacking fructose and glucose by regulation of the gut microbiota
Source: Royal Society of Chemistry journal article supplement (doi:10.1039/d4fo02781g), 2025-01-01

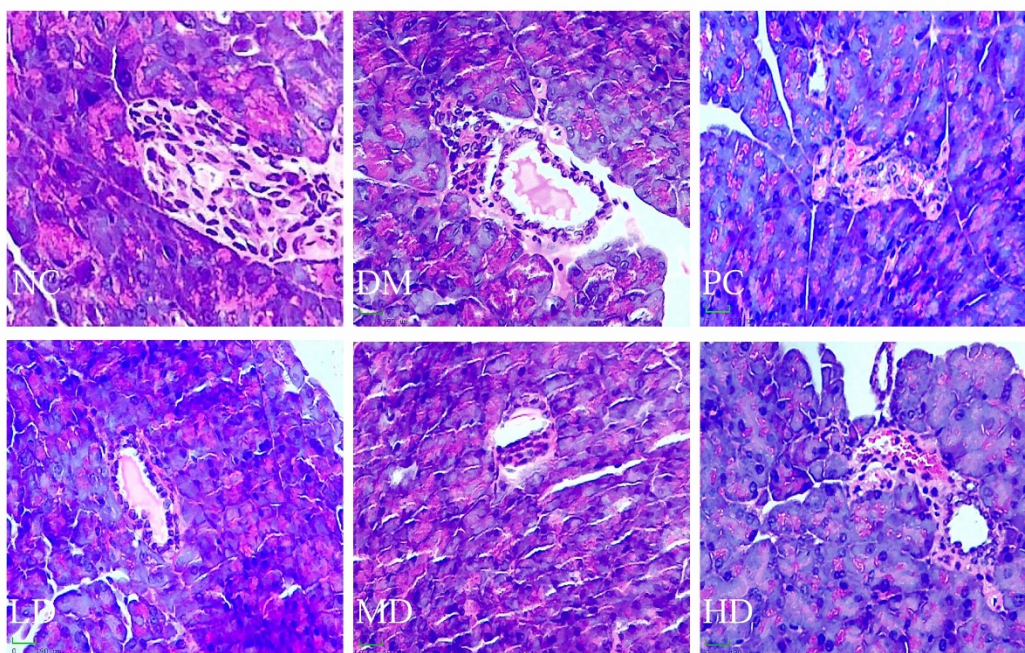

**Fig. S1** Effect of FM on the histopathology of the pancreas in diabetic mice.

Supplement: d4fo02781g1.pdf [file d4fo02781g1.pdf]
